# Supplementary material
Source: Research Square preprint supplement (doi:10.21203/rs.3.rs-8598842/v1)
Supplement: Supplementary file 1 [file 1ead61ca9626a02e5ab30553.docx]

Reviewer 1

In this manuscript,

the authors assess the prognostic value of certain markers to predict mortality as well as the diagnostic value of markers in patients of Invasive candidiasis.

there are some points to be addressed

1. in two points the IC is translated as ischemic cardiomyopathy instead of invasive candidiasis. The authors should provide an acceptable explanation for this.

Answer: Thank you for your valuable suggestions. Has been revised as invasive candidiasis

(IC).

1. the control group is consisted from unaffected patients. why the authors did not had a control group of patients with bacterial infections?

Answer: Thank you for your valuable suggestions.

1. the following sentence lacks verb and needs reformation "Conclusion, invasive candidiasis (IC) high mortality "

Answer: Thank you for your valuable suggestions. Has been revised.

1. Rewrite as "microbial OR yeast identification was performed using YST cards on the Vitek Compact-2 automated system" instead of "bacterial identification was performed using YST cards on the Vitek Compact-2 automated system".

Answer: Thank you for your valuable suggestions. Has been revised as bacterial identification was performed using YST cards on the Vitek Compact-2 automated system.

1. Comment on the low sensitivity and specificity of β-1,3- D – glucan

Answer: Thank you for your valuable suggestions.

This study reaffirms the moderate and variable diagnostic performance of the (1,3)-β-D-glucan (BDG) assay for invasive candidiasis (IC). In our cohort, using a cutoff of 100 pg/mL, the G test demonstrated an overall sensitivity of only 50% for IC. Notably, candidemia—which represented 33.5% of IC cases in this study—constituted the largest subgroup. This observed sensitivity is substantially lower than the pooled estimate of 0.73 (95% CI: 0.66–0.80) reported for candidemia in a recent meta‑analysis [12]. The discrepancy may arise from differences in patient characteristics, a higher prevalence of non‑Candida albicans species with distinct BDG expression profiles, or a greater proportion of localized rather than disseminated infections in our cohort.

6. How do the authors explain the lower susceptibility rates of voriconazole as compared to fluconazole. Do all isolates have breakpoints? For example, C glabrata for voriconazole?

7.. Discussion instead of Discussions

Answer: Thank you for your valuable suggestions. Has been revised.

8. Another limitation is the fact that the findings are applicable to the epidemiology of the area. ie in other areas that have many fluconazole resistant isolates ,as C. auris or C. parapsilosis, fluconazole is not the bast option as compares to Echinocandins.

Answer: Thank you for your valuable suggestions. Has been added.

9. In the following statement

"Consent for publication

All participants provided written informed consent for publication of the clinical data and associated images. All identifying information has been removed to protect patient anonymity."you refer to authors or patients? There is another statement before that informed consent was waived."The Ethics Committee waived the need for informed consent, ."

Answer: Thank you for your valuable suggestions. Has been revised.

10. In Table 1 rewrite as caspofungin.

Answer: Thank you for your valuable suggestions. Has been revised.

Reviewer 2

The authors review candidiasis but face methodological issues needing improvement.

First, with the Title. I identified a major issue: conceptual overload. The title attempts to cover four different axes (mortality driver, infection source, antifungal efficacy, biomarkers) without a clear unifying hypothesis. Causal overstatement: “Bloodstream invasion dominates mortality” implies causality, but the study design is retrospective and observational. Lack of focus: It is unclear whether the main message is epidemiology, diagnostics, treatment effectiveness, or prognostication.

Suggestions

• Decide on one primary message (e.g., mortality predictors or prognostic biomarkers).

• Replace causal language with associative phrasing.

Answer: Thank you for your valuable suggestions. Has been revised as “Fluconazole Survival Benefit in Invasive Candidiasis: A Retrospective Cohort Study Linking Biomarkers, Infection Source, and Outcomes”

Please all Candida as a genus and the species should be written in italic. In some lines, spaces were lacking.

Answer: Thank you for your valuable suggestions. Has been revised

**Background.** The main issues are that the background mixes well-established facts with unsupported claims, as blood cultures are slow → true. Biomarkers “could enable prompt intervention” → not demonstrated in this study, since this is retrospective and does not assess time-to-treatment changes. The quoted 56.7% mortality for candidemia is presented without context or reference and conflicts with later reported values.

Conceptual problem

The background suggests a diagnostic-interventional framework; however, the study does not evaluate diagnostic timing, decision-making, or intervention changes based on biomarkers.

Recommendation

Reframe the background to emphasize risk stratification and prognostic associations, rather than early intervention. Avoid speculative clinical impact not measured.

Methods

Major concerns

Timeframe inconsistency: “12-month retrospective cohort” vs 2013–2024 is contradictory

and undermines credibility. Heterogeneous case definition: “Sterile-site mycological evidence” includes fundamentally different syndromes (candidemia, abdominal IC, joint infections). Statistical overreach: Biomarker ROC analysis, survival comparisons between antifungals, and multivariable regression are all presented without a clear adjustment strategy, indication bias control, and treatment allocation rationale.

Antifungal analysis flaw. Comparing fluconazole vs. caspofungin survival without accounting for disease severity, ICU status, empiric vs. targeted therapy, is highly vulnerable to confounding by indication.

Recommendation:

Clarify the cohort period and justify the inclusion of non-candidemic IC. Explicitly state limitations of treatment comparisons.

Results

Internal inconsistencies:

Blood cultures are described as the primary diagnostic specimen (33.5%), yet: bloodstream infections are later treated as a distinct subgroup with extreme mortality (70.3%), creating conceptual confusion between diagnostic method and infection syndrome. “Joint infections: 0% mortality” is reported; however, the sample size is not stated, and the clinical relevance is minimal, distracting from the main outcomes.

Biomarker analysis issues: PCT and IL-6 cutoffs appear data-driven, but no validation cohort

is used. The risk of overfitting is high. Restricting analysis to “single-species infections” introduces selection bias without justification.

Survival analysis concerns, reported survival probabilities (0.815 vs 0.330) are strikingly divergent and biologically implausible without significant confounding. No hazard ratios or adjusted survival models are presented.

Interpretation of Antifungal “Efficacy”. It is a critical flaw: the text repeatedly implies therapeutic superiority of fluconazole, yet this is not a randomized comparison; fluconazole is likely used in Less severe cases, Stable patients, susceptible C. albicans infections. This statement is methodologically unsound: “Fluconazole conferred superior 90-day survival vs. caspofungin.”

Recommendation

• Rephrase as an association, not protection.

• Explicitly acknowledge confounding.

Conclusion

Overstatement, the conclusion repeats results without interpretation and again implies causality. Biomarkers are often framed as prognostic tools, but no clinical utility threshold has been validated. The protective e>ect of fluconazole is stated definitively, which is not

justified.

Missed opportunity

No discussion of selection bias, severity adjustment, generalizability, and external validation

Suggested conclusion reframing: Emphasize association, risk stratification, and hypothesis

generation, not practice change.

Strengths. Large single-center cohort, inclusion of biomarker data and attempt at multivariable modeling.

Major weaknesses. Conceptual diffuseness, Internal inconsistencies, and confounding by

indication, overinterpretation of retrospective associations

Global recommendation

As written, it overclaims clinical implications that are not supported by the study design. This research needs substantial conceptual tightening: one main objective, one primary

outcome, cautious interpretation, clear acknowledgment of limitations.

--

In line 40 of the abstract, I suggest rewriting “sample or tool” as “specimen”. Additionally, I

recommend homogenizing percentages (%) or numbers, because.

Answer: Thank you for your valuable suggestions. Has been revised as “tool”(line 40)

Line 45 of abstract, you write PCT, What is the meaning? You should always specify the meaning os abbreviations, although in abstract it is a preference to avoid abbreviations.

Answer: Thank you for your valuable suggestions. Has been revised Procalcitonin (PCT). Line 45

Line 61 and 64, again, Candida should write in italic.

Answer: Thank you for your valuable suggestions. Has been revised. Line 61 and 64.

Line 69, this phrase “Nevertheless, their diagnostic value for IC specifically remains uncertain”, it is not true in total because β-D-glucan was previously studied in candidemia. I recommend to delve into the revision of this data. (10.1111/myc.70067, 10.1177/174749301877871310.3343/alm.2023.43.4.381)

Answer: Thank you for your valuable suggestions. Has been revised as “Biomarkers such as procalcitonin (PCT), white blood cell count (WBC), and interleukin-6 (IL-6) are transforming microbiological diagnosis and infection assessment [2]. Nevertheless, their diagnostic value for IC specifically remains uncertain. (line69)

Line 69 to 71. The primary objective is to evaluate the biomarkers. I don't know if this research can prevent candidemia.

Answer: Thank you for your valuable suggestions. Has been delete”with the ultimate goal of preventing candidemia” Line 71

Line 74. In the Study Design, you should change the word “refused to participate” because

this study is retrospective, even though you specified this in the Ethics section.

Thank you for your valuable suggestions. Refused to participate has been change as” were excluded as they did not meet the inclusion criteria.” Line 75.

Line 110, again, Candida albicans should be written in italics.

Thank you for your valuable suggestions. Has been revised. Line 107.

Line 113-114, the phrase “Inpatients with ischemic cardiomyopathy (IC) died during hospitalization,” I do not understand this line as an endpoint.

Answer: Thank you for your valuable suggestions. Has been revised as Inpatients with invasive candidiasis (IC) died during hospitalization.. Line 111.

Lines 148-149, you should specify the gold standard for calculating sensitivity and

specificity.

Answer: Thank you for your valuable suggestions. Has been revised as “calculating sensitivity and specificity by maximum Jordan index” Lines 149-150.

Line 154, medical-related, not Medical related.

Answer: Thank you for your valuable suggestions. Has been revised as healthcare-associated infection (HAI). Line 155.

Line 157, which are the isolates in the polymicrobial infections?

Answer: Thank you for your valuable suggestions. Has been revised as Polymicrobial infections(Bacteria combined with candida). Line 158.

Line 161, 163-164, 175, again Candida spp or Candida albicans, and the other species

should be written in italics.

Thank you for your valuable suggestions. Has been revised. Line 165-166.

Lines 223-226: It is essential to analyze only monomicrobial infections, as elevated

procalcitonin may be associated with polymicrobial infections.

Thank you for your valuable suggestions. In this study, AUC for the biomarker diagnostic value in invasive candidiasis (Single infection,n=140 case).

Fig 1. The correct form to write is Nakaseomyces glabratus (formerly C. glabrata). The 3

should be more representative in a pie chart.

Thank you for your valuable suggestions. Has been revised.

Fig 2. I recommend putting all words with capitalization to homogenize

Thank you for your valuable suggestions. Has been revised.

Fig 4. Specified the p-value, and I recommend analyzing according to the species; there is

no sense of better survival with fluconazole, also line 188. The first analysis (4A) should also

specify the p-value.

Thank you for your valuable suggestions. Has been revised.

Fig 5. In the forest plot, there is a serious mistake with the line of bloodstream infection due

to the CI 2.438-8.054. What is the performance of the multiple regression? Why and how do

you decide the cuto> values of PCT and IL-6? The more accurate approach is to calculate

with a Youden Index. You should specify.

Thank you for your valuable suggestions. Has been revised.

Reviewer 3

Clarifications and Methodological Considerations for the Study

## Clarification of Study Methods and Results

**The study titled "Bloodstream Invasion Dominates Mortality in Invasive Candidiasis: Single-center Insights on Abdominal Origins, Antifungal Efficacy, and Biomarker-Driven Prognosis" investigates the high mortality rates associated with invasive candidiasis (IC), particularly bloodstream infections (BSIs). Here some points need clarification:**

Answer: Thank you for your valuable suggestions.Has been revised as “Fluconazole Survival Benefit in Invasive Candidiasis: A Retrospective Cohort Study Linking Biomarkers, Infection Source, and Outcomes”

### 1. Diagnostic Definitions and Sample Collection

1.1: The diagnosis of invasive candidiasis is very complex. In this work, the biological sample was selected not only from blood cultures but also from other materials. Since Candida can colonize various anatomical sites and among the included cases, a significant number showed positive cultures of PUS without any description of the collection site, could you please detail this definition or indicate the anatomical sites of origin of the PUS in detail?

Answer: Thank you for your valuable suggestions. Has been revised in:

Fig. 1 legend

Among confirmed invasive candidiasis (IC) cases, blood culture was the most frequent initial diagnostic specimen (33.5%), followed by ascitic fluid (27.0%), catheter tips (18.0%), and pus (9.9%,42 cases pus main contained abdominal abscess 26 cases, maxillofacial space infection abscess7 cases, 3 cases of liver abscess).

### 2. Medical Related Infection Explanations

1.5 page 4: Provide explanations for the MEDICAL RELATED INFECTION text box.

Answer: Thank you for your valuable suggestions. Has been revised as” Healthcare-Associated Infection (HAI)”

### 3. Endpoint Clarification

1.6: ENDPOINT. Clarify the meaning of endpoint 1.6: why is there a reference to ischemic cardiomyopathy? The same reference is found in the discussion on page 8: "Multiple regression modeling identified significant mortality risk factors for ischemic cardiomyopathy (IC): Procalcitonin (PCT) ≥ 0.778 ng/mL (OR 3.800, 95% CI 1.995–7.237; p< 0.001), IL-6 ≥ 25.375 pg/mL (OR 3.667, 95% CI 1.372–9.795; p = 0.01)."

Answer: Thank you for your valuable suggestions. Has been revised as Invasive candidiasis (IC).

### 4. Blood Culture Methodology

1.8: How many sets of blood cultures were performed for each infectious episode considered? It is not clear how much final blood volume was collected for each infectious episode considered.

Answer: Thank you for your valuable suggestions.Has been revised as” Following a standard aseptic procedure, 16-20 mL of blood was collected from adult patients and promptly aliquoted into two BD Bactec blood culture bottles: 8-10 mL into an aerobic bottle and 8-10 mL into an anaerobic bottle.”

### 5. Cultural Investigation Techniques

For the cultural investigations, specific growth media for yeasts, such as Sabouraud dextrose agar, were not used. Why?

The incubation time was only 24 hours, while it is known that the growth of many pathogenic yeasts requires 48-72 hours. Was this considered?

Answer: Thank you for your valuable suggestions. There may be something wrong with the expression.Has been revised as “Routine Fungal Culture: Tissue samples (1 cm³) obtained from sterile surgical sites were inoculated onto sheep blood agar plates. Sterile fluid specimens (including ascites, puncture fluids, and pus) were inoculated onto sheep blood agar, China Blue agar, and/or Sabouraud agar plates. Cultures were examined after 24 hours of incubation; positive results prompted immediate antifungal susceptibility testing, while negative cultures were re‑examined after extended incubation for up to 48–72 hours. Following colony formation, yeast isolates were identified using YST cards on the Vitek Compact‑2 automated system.”

### 6. Susceptibility Testing

Results: Susceptibility tests were performed with imprecise methods, a problem also highlighted by other authors (Zhang L, Wang H, Xiao M, Kudinha T, Mao L-L, et al. (2014) The Widely Used ATB FUNGUS 3 Automated Readings in China and Its Misleading High MICs of Candida spp. to Azoles: Challenges for Developing Countries’ Clinical Microbiology Labs. PLoS ONE 9(12): e114004. doi:10.1371/journal.pone.0114004), therefore the evaluation of resistance percentages is uncertain. Were confirmations made with molecular methods or other methods for the azole resistance highlighted?

Some yeast species have intrinsic resistance to fluconazole. Please detail the resistance percentages to antifungals by species.

Answer: Thank you for your valuable suggestions. To eliminate errors caused by the azole trailing effect, which can lead to misleadingly high MICs in automated systems (e.g., ATB FUNGUS 3), we adopted manual reading for all susceptibility results.

### 7. Attribution of Mortality

Table 1 shows 30 different underlying diseases of invasive candidiasis, many of which can be fatal. Please define how the causal link between IC and mortality was attributed.

Define whether mortality refers to crude or attributable mortality.

Answer: Thank you for your valuable suggestions.Has been revised as “Multiple regression analysis identified statistically significant predictors of crude mortality (p < 0.05), with several factors reaching significance at p < 0.001. ”
